# Supplementary material for: An Insertion Mutation Located on Putative Enhancer Regions of the MYB26-Like Gene Induce Inhibition of Anther Dehiscence Resulting in Novel Genic Male Sterility in Radish (Raphanus Sativus L.)
Source: Research Square preprint supplement (doi:10.21203/rs.3.rs-626059/v1), 2021-07-07
Supplement: Supplementary file 1 [file 912b26952b63c27501def5f2.docx]

**Supplementary Table 7.** Pairwise comparison of nucleotide sequence identities of the 235-bp conserved sequences and coding sequences of the *MYB26* homologs among four Brassicaceae species.

| **235-bp conserved motif** | | | | |
| --- | --- | --- | --- | --- |
|  | Radish | *B. rapa* | *B. oleracea* | *Arabidopsis* |
| Radish | 1 | 92.77 | 93.62 | 76.60 |
| *B. rapa* |  | 1 | 93.19 | 77.02 |
| *B. oleracea* |  |  | 1 | 77.02 |
| *Arabidopsis* |  |  |  | 1 |
| **Coding sequences of *MYB26* homologs** | | | | |
|  | Radish | *B. rapa* | *B. oleracea* | *Arabidopsis* |
| Radish | 1 | 93.11 | 93.11 | 79.81 |
| *B. rapa* |  | 1 | 98.11 | 77.53 |
| *B. oleracea* |  |  | 1 | 77.81 |
| *Arabidopsis* |  |  |  | 1 |
